# Supplementary material for: Identification of Tomato microRNAs in Late Response to Trichoderma atroviride
Source: MDPI journal article supplement (doi:10.3390/ijms25031617), 2024-01-28
Supplement: s1 [file s1]

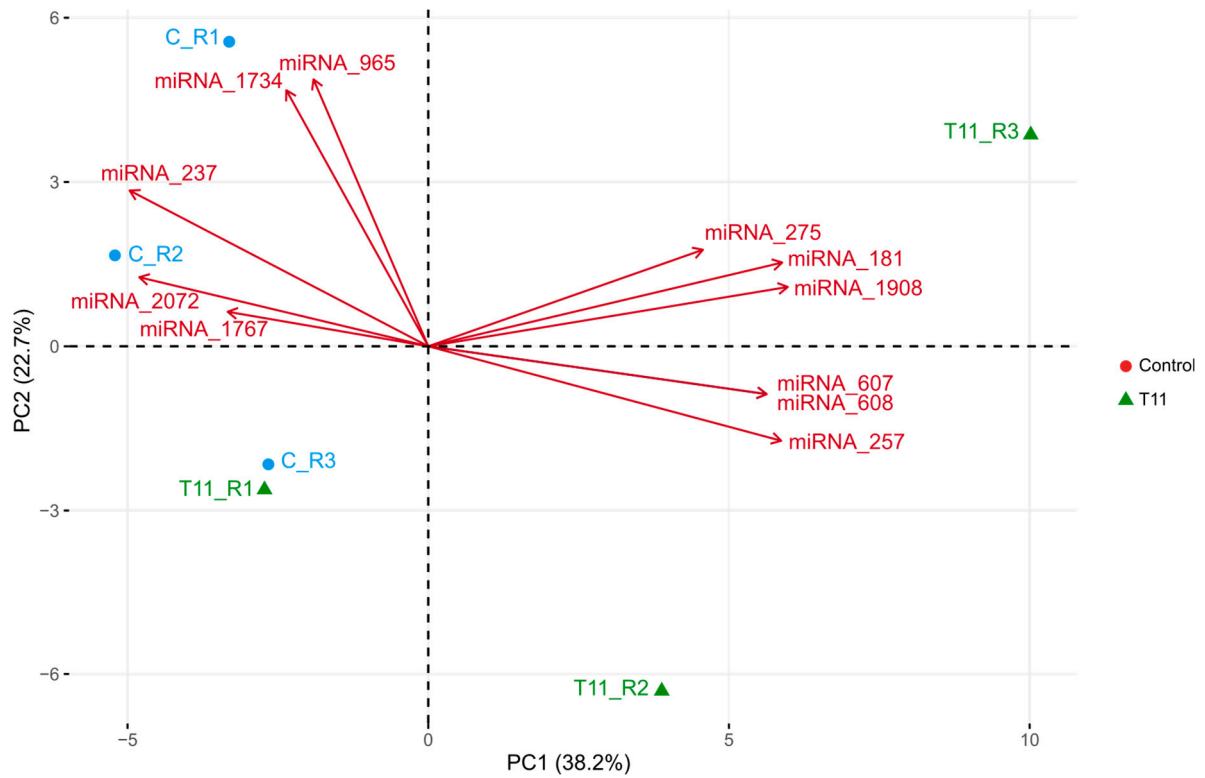

**Figure S1.** Principal Component Analysis (PCA) based on counts per million (CPM) values of the identified miRNA. The 10 DE miRNA selected for downstream analysis are shown as dark-red variables.
